# Supplementary material for: Everolimus improves neuropsychiatric symptoms in a patient with tuberous sclerosis carrying a novel TSC2 mutation
Source: Springer Nature journal article supplement (doi:10.1186/s13041-016-0222-6), 2016-05-23
Supplement: MOESM1 [file 25663210]

**Table S1.** A list of identified variants that were not detected in unaffected members but detected in affected members

| Chromosome | Position  | Reference | Alternative | dbSNP142    | Gene           | Functional category | SIFT_pred <sup>@</sup> | Polyphen2_HDIV_pred <sup>&amp;</sup> | MutationTaster_pred <sup>#</sup> |
|------------|-----------|-----------|-------------|-------------|----------------|---------------------|------------------------|--------------------------------------|----------------------------------|
| 11         | 95825277  | G         | C           | .           | <i>MAML2</i>   | ns SNV <sup>a</sup> | T                      | B                                    | D                                |
| 16         | 11773400  | C         | T           | rs184422078 | <i>TXNDC11</i> | ns SNV              | T                      | B                                    | N                                |
| 16         | 14042187  | G         | A           | rs150077735 | <i>ERCC4</i>   | ns SNV              | T                      | P                                    | D                                |
| 16         | 2051127   | T         | G           | rs541079516 | <i>ZNF598</i>  | ns SNV              | T                      | D                                    | D                                |
| 16         | 2106697   | GA        | -           | .           | <i>TSC2</i>    | frameshift deletion | .                      | .                                    | .                                |
| 16         | 5057470   | C         | T           | rs200260160 | <i>SEC14L5</i> | ns SNV              | D                      | B                                    | D                                |
| 16         | 56700837  | C         | T           | rs202203178 | <i>MT1G</i>    | ns SNV              | T                      | D                                    | D                                |
| 16         | 66918288  | G         | T           | .           | <i>PDP2</i>    | ns SNV              | T                      | P                                    | N                                |
| 16         | 70154622  | G         | C           | .           | <i>PDPR</i>    | ns SNV              | T                      | B                                    | D                                |
| 2          | 120397446 | G         | T           | rs147638703 | <i>CFAP221</i> | ns SNV              | T                      | B                                    | N                                |
| 2          | 121746230 | C         | T           | .           | <i>GLI2</i>    | ns SNV              | D                      | D                                    | D                                |
| 2          | 128471559 | G         | A           | rs185615277 | <i>WDR33</i>   | ns SNV              | T                      | B                                    | D                                |
| 3          | 157081492 | C         | T           | rs143505735 | <i>VEPH1</i>   | ns SNV              | T                      | P                                    | D                                |
| 4          | 5570315   | G         | A           | rs182298453 | <i>EVC2</i>    | ns SNV              | T                      | B                                    | N                                |

@: D. Deleterious; T, tolerated

&: D, probably damaging; P, possibly damaging; B, benign

#: D, disease causing; N, polymorphism

a: ns SNV, nonsynonymous SNV
